# Supplementary material for: Gene expression and immunohistochemical analyses of mKast suggest its late pupal and adult-specific functions in the honeybee brain
Source: PLoS One. 2017 May 4;12(5):e0176809. doi: 10.1371/journal.pone.0176809 (PMC5417555; doi:10.1371/journal.pone.0176809)
Supplement: S1 Table — (XLSX) [file pone.0176809.s001.xlsx]

## Sheet: Sheet1
Supplementary Table 1 The amounts of RNA used for qRT-PCR analyses.
	Comparison between adult body parts
			Lot No. (one sample / lot)
			1	2	3	4	5	6	7
		Brain*	5.0 x 102	4.3 x 102	5.0 x 102	5.0 x 102	5.0 x 102	5.0 x 102	5.0 x 102
		Head	1.0 x 103	1.0 x 103	1.0 x 103	1.0 x 103	1.0 x 103	1.0 x 103	1.0 x 103
		Thorax	1.0 x 103	1.0 x 103	1.0 x 103	1.0 x 103	1.0 x 103	1.0 x 103	1.0 x 103
		Abdomen	1.0 x 103	1.0 x 103	1.0 x 103	1.0 x 103	1.0 x 103	1.0 x 103	1.0 x 103	(ng)
	Comparison between adult brains and retinas
			Lot No. (three samples / lot)
			1	2	3	4	5
		Brain	1.0 x 103	1.0 x 103	1.0 x 103	1.0 x 103	1.0 x 103
		Retina	4.1 x 102	5.0 x 102	5.0 x 102	5.0 x 102	5.0 x 102	(ng)
	Comparison between metamorphosis stages
			Lot No. (one sample / lot)
			1	2	3	4	5	6	7
		L5	1.0 x 103	1.0 x 103	1.0 x 103	1.0 x 103	1.0 x 103	4.8 x 102	-
		P3	1.0 x 103	1.0 x 103	1.0 x 103	1.0 x 103	1.0 x 103	-	-
		P7	1.0 x 103	1.0 x 103	1.0 x 103	1.0 x 103	1.0 x 103	-	-
		Adult*	5.0 x 102	4.3 x 102	5.0 x 102	5.0 x 102	5.0 x 102	5.0 x 102	5.0 x 102	(ng)
*The same samples were used for these analyses.
